# Supplementary material
Source: PubMed Central journal article supplement (PMC3038718)
Supplement: 1019625108_pnas.201019625SI.pdf [file 1019625108_pnas.201019625SI.pdf]

# Supporting Information

Wang et al. 10.1073/pnas.1019625108

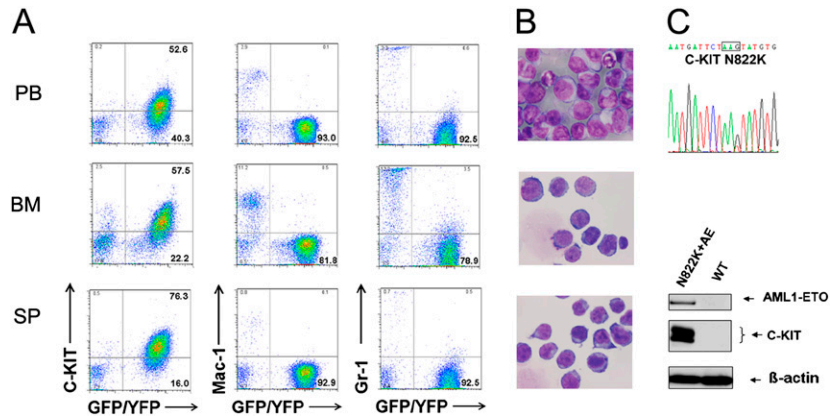

**Fig. S1.** AE and HyC-KIT N822K cooperate to induce a transplantable AML in mice. Immunophenotype analysis (A) and morphological analysis (B) of hematopoietic cells from representative diseased secondary recipients. Blood smear (PB) and cytoentrifugation of bone marrow (BM) and spleen (SP) were stained with Wright-Giemsa solution. (C) Expression of AE and HyC-KIT N822K in leukemic cells from AE+HyC-KIT N822K mice. The N822K mutation in the *HyC-KIT* cDNA was confirmed by sequencing the RT-PCR products. Expression of the human AE transcripts was verified by RT-PCR using fusion site-specific primers. Whole-cell protein lysates from splenocytes were analyzed by immunoblotting with anti-c-Kit or anti-β-actin antibody.
